# Supplementary material for: Deficiency of the human cysteine protease inhibitor cystatin M/E causes hypotrichosis and dry skin
Source: PubMed Central journal article supplement — Genet Med. 2018 Nov 14;21(7):1559–67. doi: 10.1038/s41436-018-0355-3 (PMC6752276; doi:10.1038/s41436-018-0355-3), 2018-11-14
Supplement: 41436_2018_355_MOESM1_ESM.pdf [file 41436_2018_355_MOESM1_ESM.pdf]

## **Supplementary information**

**Deficiency of the human cysteine protease inhibitor cystatin M/E causes  
hypotrichosis and dry skin**

**Ellen HJ van den Bogaard et al.**

## **Supplementary Material & methods**

### **Infinium\_CytoSNP\_850K genotyping array analysis**

DNA amplification, tagging and hybridization were performed according to the manufacturer's protocol (Illumina). The array slides were scanned on an iScan Reader (Illumina). Data analysis was performed using Nexus Copy Number 5.0 (BioDiscovery, El Segundo). The HapMap control set provided by the manufacturer was used as a control. 50-200 ng of DNA was used. Standard settings for SNP arrays in Nexus were adjusted: a cutoff value of 0.15, homozygous frequency threshold of 0.95 and minimum loss-of-heterozygosity (region with LOH) length of 5000 kb were set (SNP-FASST Rank Segmentation). QC measurement in Nexus was used as a measure of the array profile quality. Samples with  $QC < 0.13$  were further analyzed. UCSC built Hg19 (Human February 2009, Genome Reference Consortium GRCh37 Assembly) was used to analyze the data.

### **Exome sequencing**

Exome sequencing was performed on genomic DNA extracted from the blood of the index patient (PIII:2). Exome enrichment (Agilent SureSelectXT Human All Exon 50Mb), exome sequencing (Illumina HiSeq), read alignment (BWA) and variant calling (GATK) were done at BGI-Europe (Denmark). Variant annotation, selection, and prioritizing were done by the department of Human genetics, Radboudumc with an in-house developed software tool. The 'full' dataset was analyzed for deletions, insertions, nonsense and canonical splice site mutations, and missense mutations (PhyloP of base  $> 3.5$ ). Only those variants that are likely to be causative (by literature, expression profile, etc.) were selected for further studies.

### **Biophysical measurements**

Prior to measurements, patients and healthy volunteers acclimatized for at least 15 minutes in a temperature-controlled room with the body site to be assessed, the right mid-ventral forearm,

uncovered. The biophysical techniques included: (i) trans epidermal water loss measurement for the indirect assessment of the skin barrier function (Aquaflux AF200, Biox), (ii) capacitance for the indirect measurement of SC hydration (Epsilon E100, Biox), and (iii) skin redness and pigmentation ( $a^*$  and  $b^*$  values measured by spectrophotometer 2600d, Konica Minolta). Three measurements per body site were performed. In addition, morphological imaging with *in vivo* reflectance confocal microscopy (RCM, Vivascope 1500 system, Caliber) was performed. At least four horizontal maps of 4 mm x 4 mm (Vivablock) were made at the level of the SC/stratum granulosum, stratum spinosum, the dermal epidermal junction and dermis. Two vertical mappings (Vivastack) were made by capturing a series of images of 0.5 mm x 0.5 mm starting from the skin surface up to 150  $\mu$ m in depth with steps of 3  $\mu$ m. Thickness of the SC and living epidermis were measured as previously described.<sup>1</sup>

#### **RNA isolation and qPCR analysis**

The epidermis of the skin biopsies was separated from the dermis by dispase (Roche) treatment for 2 hours at 4°C. Epidermal equivalents were directly placed in lysis buffer and stored at -80°C. RNA isolation, cDNA synthesis and qPCR analysis was performed as described earlier.<sup>2</sup> Target gene expression was normalized to the expression of the house keeping gene, human acidic ribosomal phosphoprotein P0 (*RPLP0*). The  $\Delta\Delta C_t$  method was used to calculate relative mRNA expression levels.<sup>3</sup>

#### **Morphological and immunohistochemical analysis**

Skin biopsies (3 mm) and reconstructed epidermal equivalents were fixed in a 4% buffered formalin solution (Baker Mallinckrodt, Deventer, The Netherlands) for 4 hours and subsequently embedded in paraffin. 6  $\mu$ m paraffin sections were stained with hematoxylin and eosin or with antibodies using an indirect immunoperoxidase technique (Vectastain, Vector Laboratories).

#### **Protein extraction from epidermal equivalents**

Proteins were extracted from the 3D epidermal equivalents using a buffer containing 20 mM Tris-HCl (pH 8), 0.1 M NaCl, 1 mM EDTA, 2 mM dithiothreitol (DTT), followed by three cycles of freeze/thawing of the epidermis in extraction buffer and a mild sonification of the lysate for 1 minute at 4°C. For enzymology experiments, the extracts were centrifugated for 10 minutes and 15.000 × *g* at 4°C. The supernatants that harbor the soluble epidermal proteins were stored at -80°C. For Western blotting, sonificated lysates were stored at -80°C.

### **Western blotting**

Proteins were separated by SDS-PAGE using the NuPAGE electrophoresis system and pre-cast 12% Bis-Tris polyacrylamide gels under reducing conditions (Invitrogen). For immunoblotting the proteins were electroblotted onto polyvinylidene difluoride membrane (Invitrogen) for 60 minutes at 30 V. The membrane was blocked with Blotto (Thermo Scientific) and incubated o/n at 4°C with polyclonal goat anti-human cystatin M/E (clone AF1268, 1:250, R&D Systems) or mouse anti-human β-actin (clone AC-15, 1:100.000, Sigma). Detection of the proteins was established using rabbit anti-goat-HRP linked antibody (1:2000, Biovision) for cystatin M/E, and anti-mouse HRP-linked antibody (1:2000, Cell Signaling) for β-actin followed by chemiluminescence detection using SuperSignal™ West Femto Maximum Sensitivity Substrate (Thermo Scientific) and Image Lab software (Biorad)

### Supplementary Figures

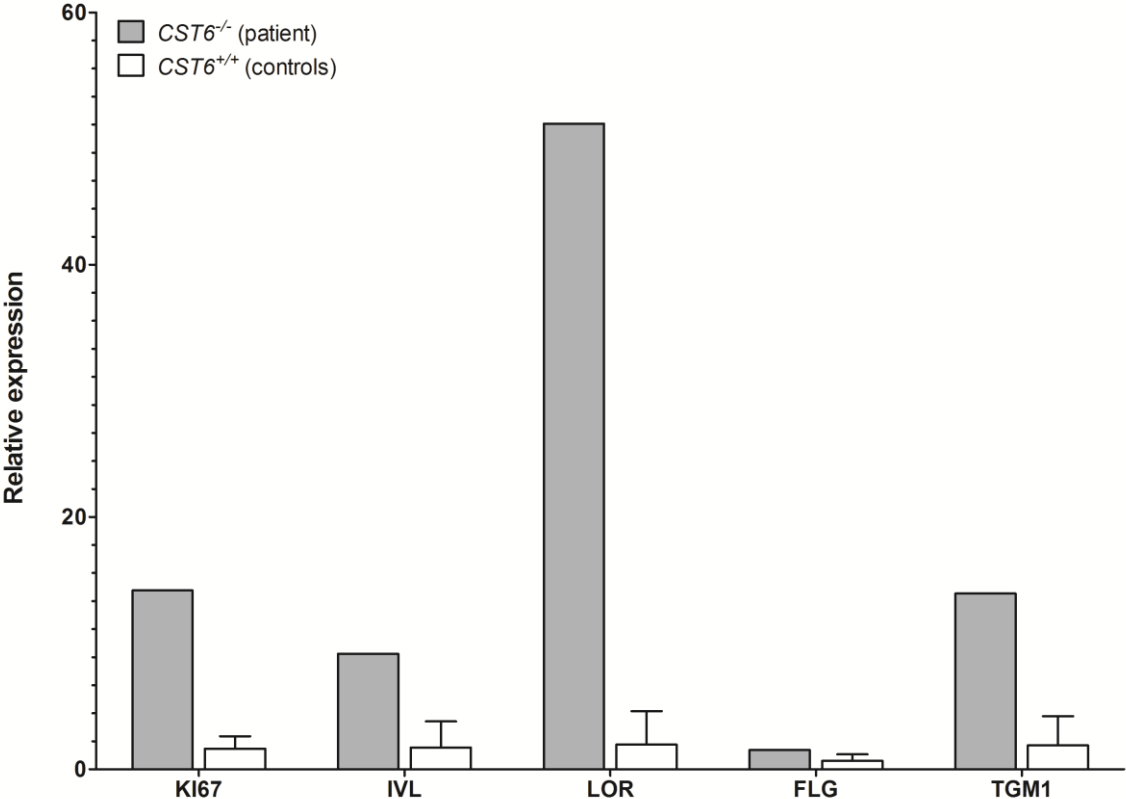

**Figure S1. Gene expression.** Relative mRNA expression levels in skin biopsies of the patient (grey bars) and healthy controls (*CST6* wild type, *CST6*<sup>+/+</sup>, N=6, white bars). The patient showed induced expression of *KI67*, differentiation genes (*IVL*, *LOR* and *FLG*), and *TGM1*.

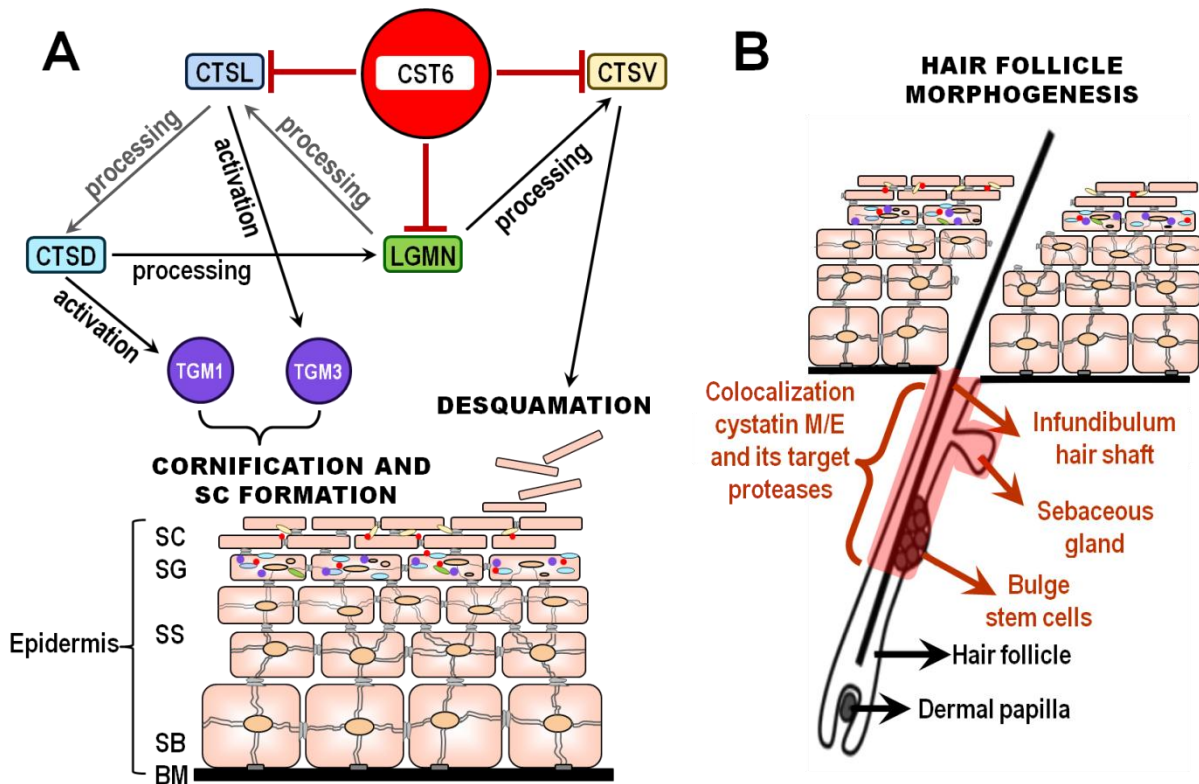

**Figure S2. Proposed role of cystatin M/E in regulation of epidermal cornification, stratum corneum formation, desquamation and hair follicle maintenance.** This scheme is compiled based on biochemical and cell biological data from human studies. Human cystatin M/E (CST6) is an inhibitor of legumain (LGMN), cathepsin L (CTSL) and cathepsin V (CTSV). (A) In the epidermis, CST6 is important in the cornification process by controlling CTSL activity, which is the elusive processing and activating enzyme for transglutaminase 3 (TGM3). CTSL also can process cathepsin D (CTSD), which in turn can activate TGM1. Inhibition of LGMN regulates the processing of (pro)-cathepsins. Inhibition of CTSV regulates desquamation, as CTSV is able to degrade (corneo)-desmosomal proteins like desmoglein-1, desmocollin-1, and corneodesmosin. Biochemical functions that are known from literature are depicted by grey (arrow) lines, black lines represent our previous investigations. BM, basal membrane; SB, stratum basale; SS, stratum spinosum; SG, stratum granulosum; SC, stratum corneum. (B) In the hair follicle, CST6 colocalizes with all target proteases in the distal part and infundibulum<sup>4</sup>. Co-localization is also found in the area around the bulge where the epithelial stem cells reside. CST6 is absent in the proximal part, the hair bulb. Colocalization with CTSL and LGMN, but not CTSV, is also found in the sebaceous glands<sup>4</sup>.

## Supplementary Tables

**Table S1. Human protease/inhibitor disorders with skin and/or hair phenotypes**

| <b>Disease<br/>(MIM#, gene locus)</b>                       | <b>Affected gene and mechanism</b>                                                                                                                                                                                                                                                                  | <b>Clinical manifestations</b>                                                                                                                                                       | <b>Ref</b> |
|-------------------------------------------------------------|-----------------------------------------------------------------------------------------------------------------------------------------------------------------------------------------------------------------------------------------------------------------------------------------------------|--------------------------------------------------------------------------------------------------------------------------------------------------------------------------------------|------------|
| Netherton syndrome<br>(MIM 256500, 5q32)                    | <i>SPINK5</i> (MIM 605010). Autosomal recessive mutations in gene that encodes for serine protease <b>inhibitor</b> (LEKT1) results in increased protease activity in the SC, accelerated degradation of desmoglein-1, and overdesquamation of corneocytes.                                         | Ichthyosis with variable erythroderma, hair shaft defects ('bamboo hair') and atopic features.                                                                                       | 5          |
| Papillon-Lefèvre syndrome<br>(MIM 245000, 11q14.1-q14.3)    | <i>CTSC</i> (MIM 602365). Autosomal recessive mutations in this cysteine <b>protease</b> (cathepsin C) are associated with a reduced host response against bacteria in dental plaques; unknown role in epidermal differentiation and desquamation ( intracellular degradation/processing proteins). | Hyperkeratosis of palms and soles, severe early onset periodontitis.                                                                                                                 | 6          |
| ARCI11<br>(MIM 610765, 11q24.3)                             | <i>ST14</i> (MIM 606797). Autosomal recessive mutations in the transmembrane serine <b>protease</b> (Matriptase). Involved in degradation of SC corneodesmosomes and profilaggrin-processing. Matriptase could be considered as a key enzyme in terminal epidermal differentiation.                 | Ichthyosis with hypotrichosis, eye abnormalities (photophobia and blepharitis), teeth abnormalities, hypohidrosis.                                                                   | 7          |
| IFAP/Brescheck syndrome<br>(MIM 308205, Xp22.12)            | <i>MBTPS2</i> (MIM 300294). X-linked recessive mutations in this membrane-embedded zinc metallo <b>protease</b> are associated with disturbed cholesterol homeostasis and ER stress response                                                                                                        | IFAP syndrome (ichthyosis follicularis with atrichia and photophobia) with or without additional features (e.g. corneal opacifications, mental retardation, skeletal malformations). | 8          |
| Peeling skin syndrome 4<br>(PSS4)<br>(MIM 607936, 3q21.1)   | <i>CSTA</i> (MIM 184600). Autosomal recessive mutations in the cysteine protease <b>inhibitor</b> cystatin A cause cell-cell adhesion defects in human keratinocytes                                                                                                                                | Exfoliative ichthyosis with peeling of nonerythematous skin on the palms and soles.                                                                                                  | 9          |
| Peeling skin syndrome 5<br>(PSS5)<br>(MIM 617115, 8q22.1)   | <i>SERPINB8</i> (MIM 601697). Autosomal recessive mutations in this serine protease <b>inhibitor</b> cause cell-cell adhesion defects in human keratinocytes.                                                                                                                                       | Exfoliative ichthyosis with superficial peeling of dorsal and palmar surfaces of the hands and feet.                                                                                 | 10         |
| keratolytic winter erythema (KWE)<br>(MIM 148370, 8p23-p22) | <i>CTSB</i> (MIM 116810). Autosomal dominant tandem duplications in a non-coding genomic region containing an active enhancer element for the cysteine <b>protease</b> cathepsin B, which is involved in keratinocyte homeostasis.                                                                  | Episodes of palmoplantar erythema and epidermal peeling.                                                                                                                             | 11         |

**Table S2. qPCR primers**

| <b>HUGO gene symbol</b> | <b>Description gene/protein</b> | <b>Forward primer (5' → 3')</b> | <b>Reverse primer (5' → 3')</b> |
|-------------------------|---------------------------------|---------------------------------|---------------------------------|
| FLG                     | Filaggrin                       | acttactgagtttcttctgatgtatt      | tccagactgagggctttttctg          |
| IVL                     | Involucrin                      | acttattcgggtccgctaggt           | gagacatgtagaggacagagtcaag       |
| KI67                    | Ki-67                           | aaaccaacaagaggaacacaaatt        | gtctggagcgcaggatattc            |
| LOR                     | Loricrin                        | aggtaagacatgaaggattgcaa         | ggcaccgatgggcttagag             |
| RPLP0                   | Ribosomal phosphoprotein P0     | caccattgaaatcctgagtgatgt        | tgaccagcccaaggagaag             |
| TGM1                    | Transglutaminase 1              | ccccgcaatgagatctaca             | atcctcatggtccacgtacaca          |



**Table S3. Antibodies for immunohistochemistry**

| <b>Target protein</b>     | <b>Antibody clone, manufacturer</b>           | <b>Dilution</b> |
|---------------------------|-----------------------------------------------|-----------------|
| Cystatin M/E (CST6)       | AF1286, R&D                                   | 1 : 200         |
| CD31                      | DAKO M0823                                    | 1 : 5           |
| Elastica v Gieson         | Merck 1.15974.0002                            |                 |
| Filaggrin (FLG)           | NCL-filaggrin, Novocastra                     | 1:200           |
| Involucrin (IVL)          | MON-150, generated by our group <sup>12</sup> | 1:20            |
| Ki67                      | DAKO, M7240                                   | 1 : 50          |
| Loricrin (LOR)            | PRB145P, Covance                              | 1:2000          |
| Transglutaminase-1 (TGM1) | H-87, Santa Cruz                              | 1:100           |

**Table S4. Clinical characteristics of the patients**

| <b>Characteristics</b> | <b>Patient PII:2</b>                                                                                                                        | <b>Patient PIII:2</b>                                                                                                                  |
|------------------------|---------------------------------------------------------------------------------------------------------------------------------------------|----------------------------------------------------------------------------------------------------------------------------------------|
| Age (years):           | 32                                                                                                                                          | 10                                                                                                                                     |
| Sex:                   | Male (father)                                                                                                                               | Female (daughter)                                                                                                                      |
| Skin:                  | Dry skin (whole body)<br>Itching<br>Eczema                                                                                                  | Extremely dry skin (face, hands, arms)<br>No itching<br>Eczema                                                                         |
| Hair:                  | Scalp hair disappeared at 4 years<br>Sparse body hair<br>Slowly growing<br>Facial hair (beard) falls out                                    | Scalp hair disappeared at 4 years<br>Sparse body hair<br>Slowly growing                                                                |
| Eyes:                  | Normal eye brows<br>Little eye lashes<br>Photophobia (sunglasses required)<br>Extremely dry eyes, no tears                                  | Normal eye brows<br>Little eye lashes (break off)<br>Photophobia (mild)<br>Blepharitis (continuous)                                    |
| Other:                 | Hyperlinearity<br>Abnormal sweating (only after extreme physical exercise)<br>No teeth or nail abnormalities<br>No palmoplantar keratoderma | Hyperlinearity<br>Abnormal sweating (little)<br>No teeth or nail abnormalities<br>No collodion membrane<br>No palmoplantar keratoderma |

**Table S5. Biophysical parameters**

| Mid-ventral forearm                                            | Patient PII:2                                                  | Healthy controls                                   |
|----------------------------------------------------------------|----------------------------------------------------------------|----------------------------------------------------|
| <b>Transepidermal Water Loss</b><br>TEWL [g/m <sup>2</sup> h]  | (n=1)<br>13.52 ± 0.34 <sup>a</sup>                             | (n=27) <sup>13</sup><br>10.4 ± 1.54                |
| <b>Spectrophotometer</b><br>a* (Redness)<br>b* (Pigmentation)  | (n=1)<br>9.08 ± 0.18 <sup>a</sup><br>16.34 ± 0.16 <sup>a</sup> | (n=11) <sup>14</sup><br>5.1 ± 0.6<br>14.9 ± 1.5    |
| <b>RCM</b><br>Stratum Corneum Thickness (μm)<br>Epidermis (μm) | (n=1)<br>15.46 ± 0 <sup>b</sup><br>58.76 ± 4.38 <sup>b</sup>   | (n=4)<br>10.98 ± 1.58 <sup>c</sup><br>38.48 ± 4.39 |

Data are represented as the mean ± SD. Data are based on <sup>a</sup> three measurements within one person, <sup>b</sup> two measurements within one person, and <sup>c</sup> three measurement per person (= 12 measurements).

**Table S6.  $K_i$  values of wild type human cystatin M/E and the mutated variant p.Gln121\***

| <b>Cystatin M/E</b> | <b><math>K_i</math> Cathepsin L</b> | <b><math>K_i</math> Cathepsin V</b> | <b><math>K_i</math> Cathepsin B</b> | <b><math>K_i</math> Legumain</b> |
|---------------------|-------------------------------------|-------------------------------------|-------------------------------------|----------------------------------|
| Wild type           | 1.78 <sup>h</sup>                   | 0.47 <sup>h</sup>                   | >100 <sup>a</sup>                   | 0.25 <sup>h</sup>                |
| p.Gln121*           | >100 <sup>b</sup>                   | >100 <sup>c</sup>                   | >100 <sup>d</sup>                   | >100 <sup>e</sup>                |
| Denaturated         | >100 <sup>f</sup>                   | n.d.                                | n.d.                                | >100 <sup>g</sup>                |

<sup>a</sup> $v_i/v_0 > 0.71$  at  $[I] = 300$  nM, <sup>b</sup> $v_i/v_0 > 0.86$  at  $[I] = 300$  nM, <sup>c</sup> $v_i/v_0 > 0.98$  at  $[I] = 300$  nM, <sup>d</sup> $v_i/v_0 > 0.96$  at  $[I] = 300$  nM, <sup>e</sup> $v_i/v_0 > 1.09$  at  $[I] = 300$  nM, <sup>f</sup> $v_i/v_0 > 1.15$  at  $[I] = 300$  nM, <sup>g</sup> $v_i/v_0 > 0.64$  at  $[I] = 300$  nM, <sup>h</sup> $K_i$  data wild type protein from Cheng *et al.*<sup>15</sup>.

## Supplementary References

1. Peppelman M, van den Eijnde WA, Jaspers EJ, Gerritsen MJ, van Erp PE. Combining tape stripping and non-invasive reflectance confocal microscopy : an in vivo model to study skin damage. *Skin Res Technol.* 2015;21(4):474-484.
2. Bergboer JG, Tjabringa GS, Kamsteeg M, et al. Psoriasis risk genes of the late cornified envelope-3 group are distinctly expressed compared with genes of other LCE groups. *Am J Pathol.* 2011;178(4):1470-1477.
3. Livak KJ, Schmittgen TD. Analysis of relative gene expression data using real-time quantitative PCR and the 2(-Delta Delta C(T)) Method. *Methods.* 2001;25(4):402-408.
4. Cheng T, van Vlijmen-Willems IM, Hitomi K, et al. Colocalization of cystatin M/E and its target proteases suggests a role in terminal differentiation of human hair follicle and nail. *J Invest Dermatol.* 2009;129(5):1232-1242.
5. Chavanas S, Bodemer C, Rochat A, et al. Mutations in SPINK5, encoding a serine protease inhibitor, cause Netherton syndrome. *Nat Genet.* 2000;25(2):141-142.
6. Toomes C, James J, Wood AJ, et al. Loss-of-function mutations in the cathepsin C gene result in periodontal disease and palmoplantar keratosis. *Nat Genet.* 1999;23(4):421-424.
7. Basel-Vanagaite L, Attia R, Ishida-Yamamoto A, et al. Autosomal recessive ichthyosis with hypotrichosis caused by a mutation in ST14, encoding type II transmembrane serine protease matriptase. *Am J Hum Genet.* 2007;80(3):467-477.
8. Oeffner F, Fischer G, Happle R, et al. IFAP syndrome is caused by deficiency in MBTPS2, an intramembrane zinc metalloprotease essential for cholesterol homeostasis and ER stress response. *Am J Hum Genet.* 2009;84(4):459-467.
9. Blaydon DC, Nitoiu D, Eckl KM, et al. Mutations in CSTA, encoding Cystatin A, underlie exfoliative ichthyosis and reveal a role for this protease inhibitor in cell-cell adhesion. *Am J Hum Genet.* 2011;89(4):564-571.

10. Pigors M, Sarig O, Heinz L, et al. Loss-of-Function Mutations in SERPINB8 Linked to Exfoliative Ichthyosis with Impaired Mechanical Stability of Intercellular Adhesions. *Am J Hum Genet.* 2016;99(2):430-436.
11. Ngcungcu T, Oti M, Sitek JC, et al. Duplicated Enhancer Region Increases Expression of CTSB and Segregates with Keratolytic Winter Erythema in South African and Norwegian Families. *Am J Hum Genet.* 2017;100(5):737-750.
12. van Duijnhoven JL, Schalkwijk J, Kranenborg MH, et al. MON-150, a versatile monoclonal antibody against involucrin: characterization and applications. *Arch Dermatol Res.* 1992;284(3):167-172.
13. Falcone D, Spee P, Salk K, Peppelman M, van de Kerkhof PCM, van Erp PEJ. Measurement of skin surface biomarkers by Transdermal Analyses Patch following different in vivo models of irritation: a pilot study. *Skin Res Technol.* 2017;23(3):336-345.
14. Falcone D, Uzunbajakava NE, van Abeelen F, et al. Effects of blue light on inflammation and skin barrier recovery following acute perturbation. Pilot study results in healthy human subjects. *Photodermatol Photoimmunol Photomed [Epub ahead of print].* 2017.
15. Cheng T, Hitomi K, van Vlijmen-Willems IM, et al. Cystatin M/E is a high affinity inhibitor of cathepsin V and cathepsin L by a reactive site that is distinct from the legumain-binding site. A novel clue for the role of cystatin M/E in epidermal cornification. *J Biol Chem.* 2006;281(23):15893-15899.
